# Supplementary material for: Synthesis and performance of cross-linked PEDOT:MOI-P(SS-HEA) transparent conductive films by UV irradiation
Source: Royal Society of Chemistry journal article supplement (doi:10.1039/c6ra02859d), 2016-01-01
Supplement: c6ra02859d1.pdf [file c6ra02859d1.pdf]

## Supporting Information

Synthesis and performance of cross-linked PEDOT:MOI-P(SS-HEA)  
transparent conductive films by UV irradiation

Lei Cao<sup>†</sup>, Qianqiu Tang<sup>†</sup>, Gengchao Wang\*

*Shanghai Key Laboratory of Advanced Polymeric Materials, School of Materials Science and Engineering, Key Laboratory for Ultrafine Materials of Ministry of Education, East China University of Science and Technology, Shanghai 200237, P.R.China*

---

<sup>†</sup> These authors contributed equally to this work.

\* Corresponding author. Tel.: +86-21-64253527. E-mail address: gengchaow@ecust.edu.cn (G.-C. Wang) .

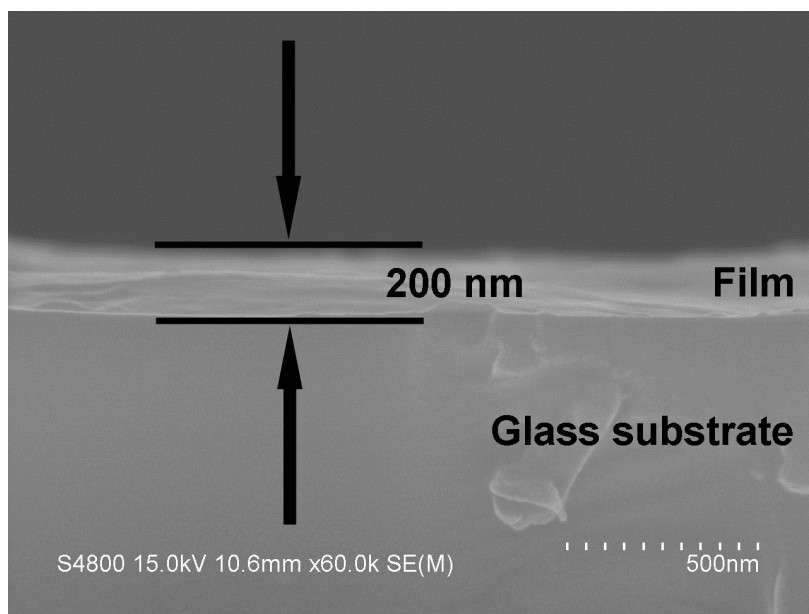

**Fig. S1** Cross-sectional FE-SEM image of PEDOT:MOI-P(SS-HEA) conductive thin film on glass substrate.

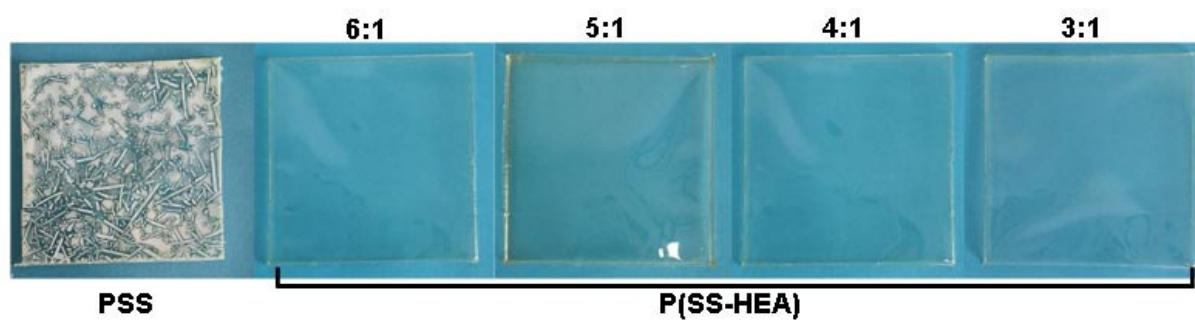

**Fig. S2** The film forming ability of PSS, various SSNa/HEA molar ratios of P(SS-HEA) films, the films were formed on  $10 \times 10 \text{ cm}^2$  glass substrates.

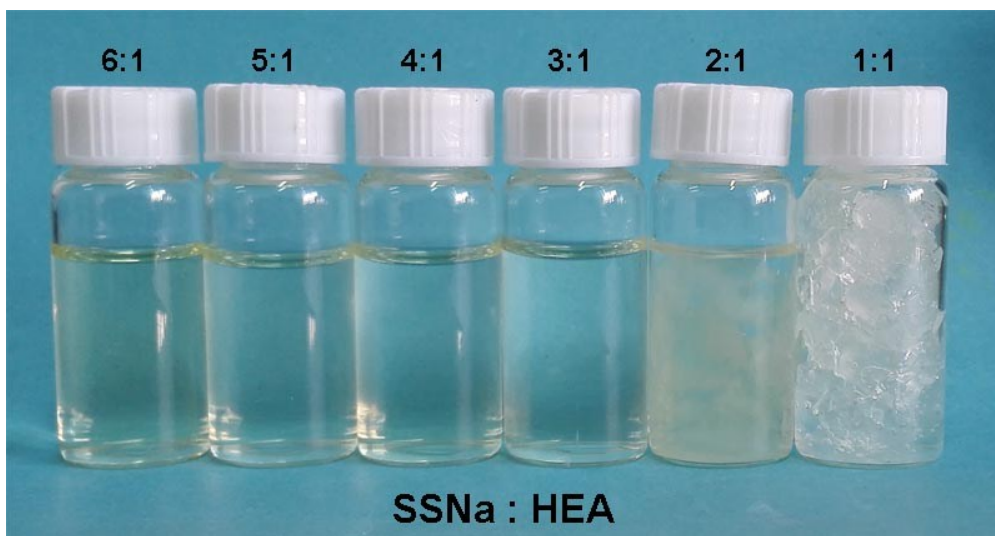

**Fig. S3** The water-solubility of P(SS-HEA) with various SSNa/HEA molar ratios.

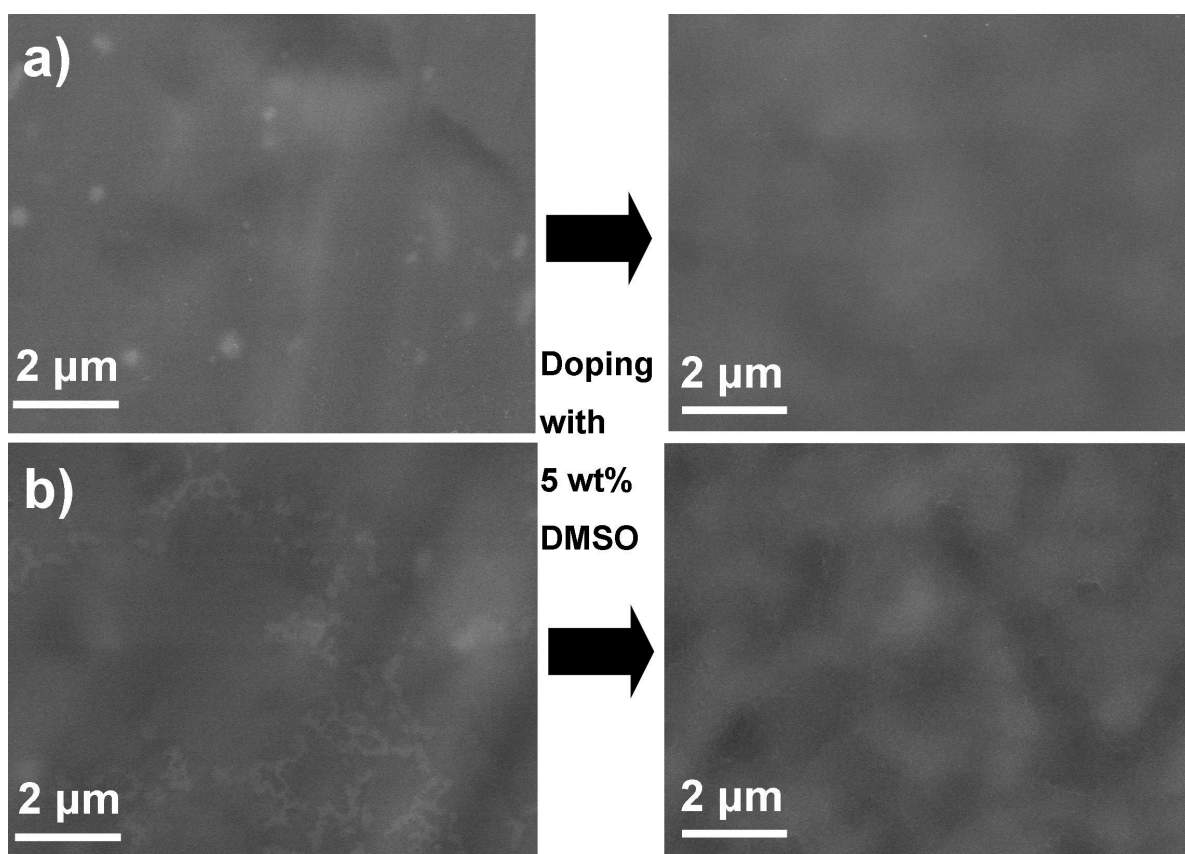

**Fig. S4** FE-SEM images of a) PEDOT:PSS and b) PEDOT:MOI-P(SS-HEA).
